# Supplementary material for: Social Features of Online Networks: The Strength of Intermediary Ties in Online Social Media
Source: PubMed Central journal article supplement (PMC3256152; doi:10.1371/journal.pone.0029358), 2012-01-11

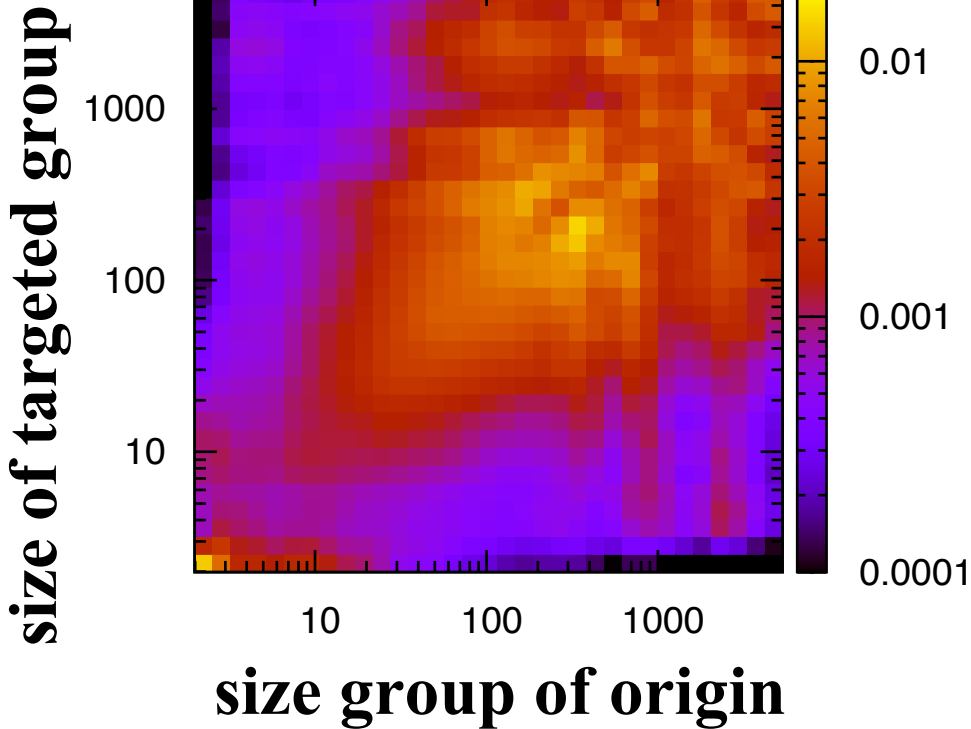

Supplement: pone.0029358.s002.pdf [file pone.0029358.s002.pdf]
