# Supplementary material for: Social Features of Online Networks: The Strength of Intermediary Ties in Online Social Media
Source: PubMed Central journal article supplement (PMC3256152; doi:10.1371/journal.pone.0029358), 2012-01-11
Supplement: pone.0029358.s015.pdf [file pone.0029358.s015.pdf]

Table 1: Summary of the results regarding internal connections when the groups are obtained with several clustering algorithms for different samples of the network. We measure the trend of the mentions to concentrate in internal connections. Legend: *w* - weak signal, *sg* - signal only for small groups, typically smaller than 10 members, a hyphen is inserted if we have no results.

| Network sample  | Nodes     | Edges      | Oslo | Infomap | Moses | Real-time | Louvain   | Radatools | Figure |
|-----------------|-----------|------------|------|---------|-------|-----------|-----------|-----------|--------|
| Whole network   | 2 408 534 | 48 776 888 | ✓    | ✓       | -     | ✓         | <i>w</i>  | -         | S6     |
| Snowball 2 hops | 61 492    | 5 558 036  | ✓    | ✓       | ✓     | ✗         | ✗         | -         | S7     |
| Snowball 3 hops | 175 078   | 10 356 020 | ✓    | ✓       | ✓     | <i>w</i>  | ✓         | -         | S8     |
| Random 200k     | 200 000   | 346 578    | ✓    | ✓       | ✓     | <i>sg</i> | <i>sg</i> | <i>sg</i> | S9     |
| No hubs         | 2 395 415 | 23 404 103 | -    | ✓       | ✓     | <i>w</i>  | ✗         | -         | S10    |
| Oslo groups     | 99 832    | 1 216 942  | ✓    | ✓       | ✓     | ✓         | ✓         | ✓         | S11    |
