# Supplementary material for: Social Features of Online Networks: The Strength of Intermediary Ties in Online Social Media
Source: PLOS journal article supplement (doi:10.1371/journal.pone.0029358), 2012-01-11

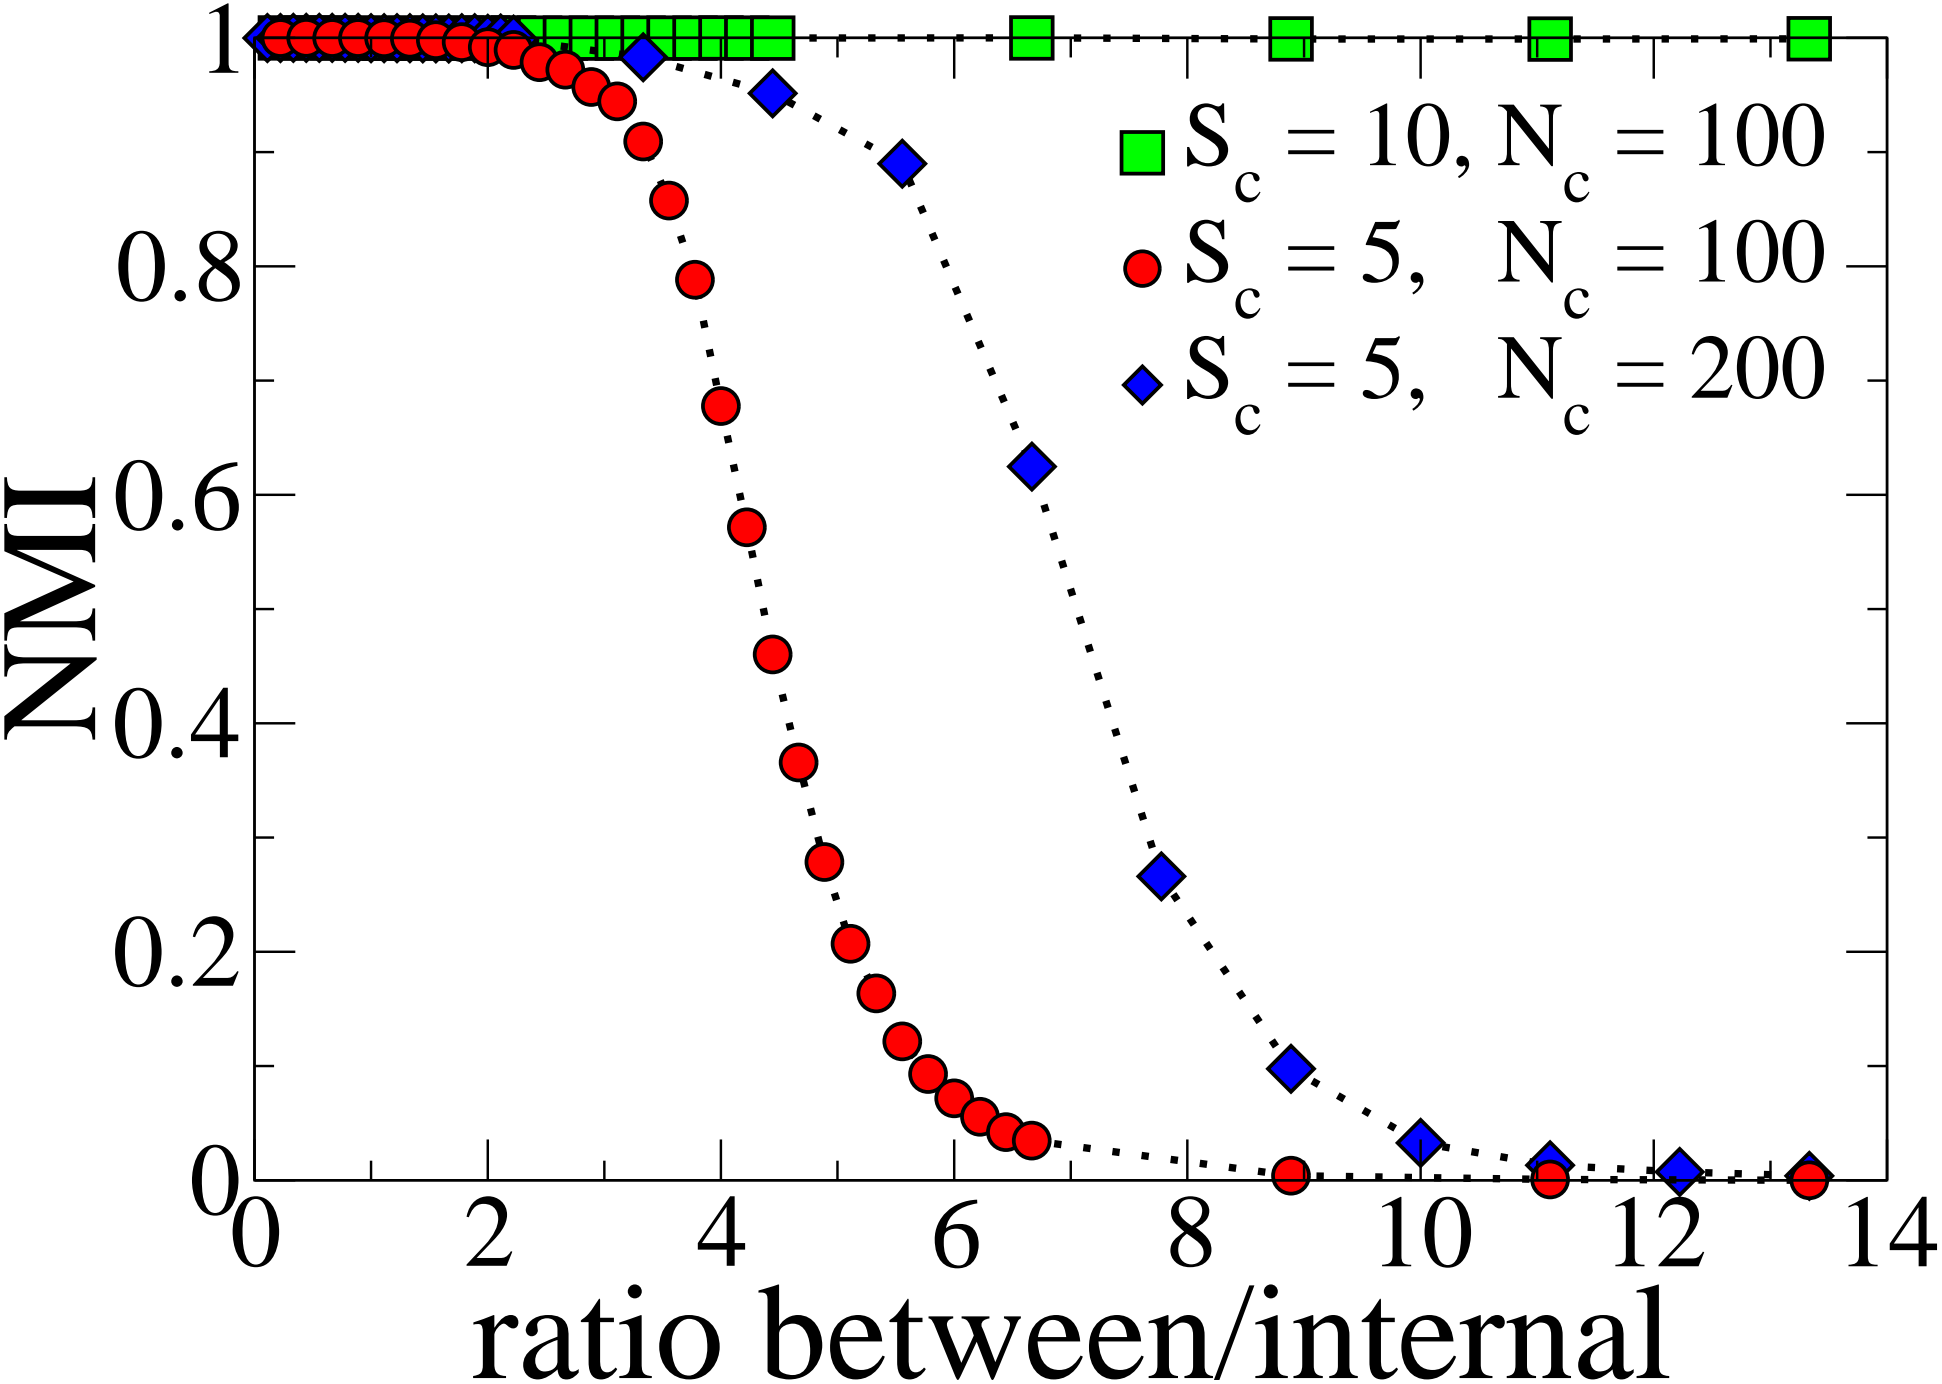

Supplement: S5 (10.1371/journal.pone.0029358.s005) [file journal.pone.0029358.s005]
